# Supplementary material for: Nonoperative Treatment as an Option for Isolated Anterior Cruciate Ligament Injury: A Systematic Review and Meta-analysis
Source: PubMed Central journal article supplement — Orthop J Sports Med. 2024 Apr 8;12(4):23259671241239665. doi: 10.1177/23259671241239665 (PMC11005505; doi:10.1177/23259671241239665), 2024-04-08
Supplement: sj-pdf-2-ojs-10.1177_23259671241239665.pdf [file sj-pdf-2-ojs-10.1177_23259671241239665.pdf]

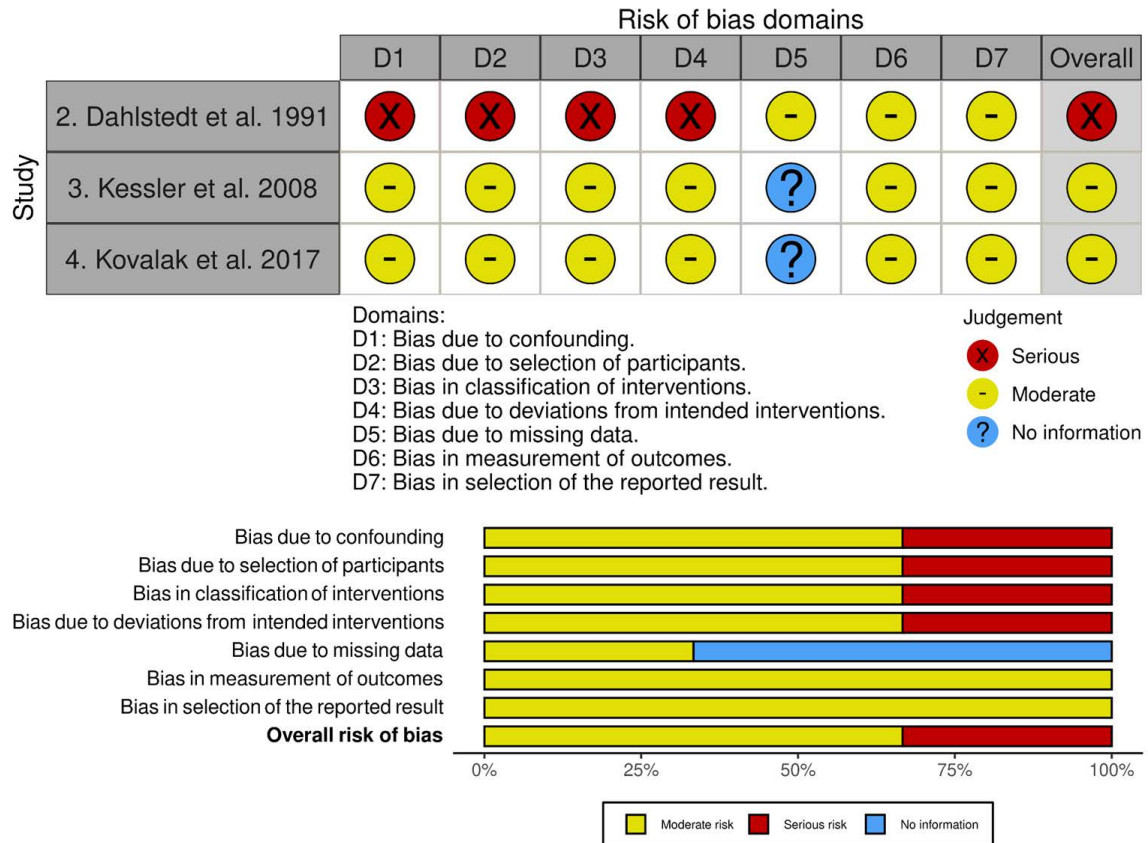

Supplemental Figure S1. ROBINS-I Summary

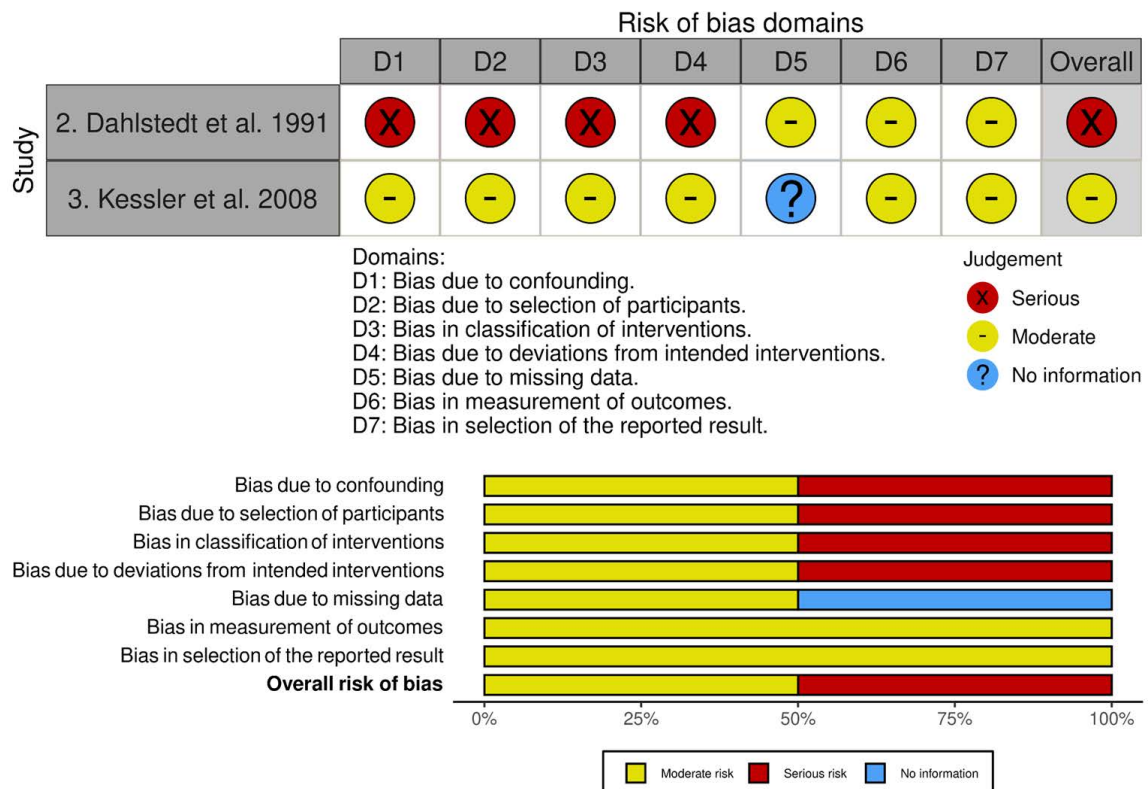

Supplemental Figure S2. ROBINS-I Knee laxity

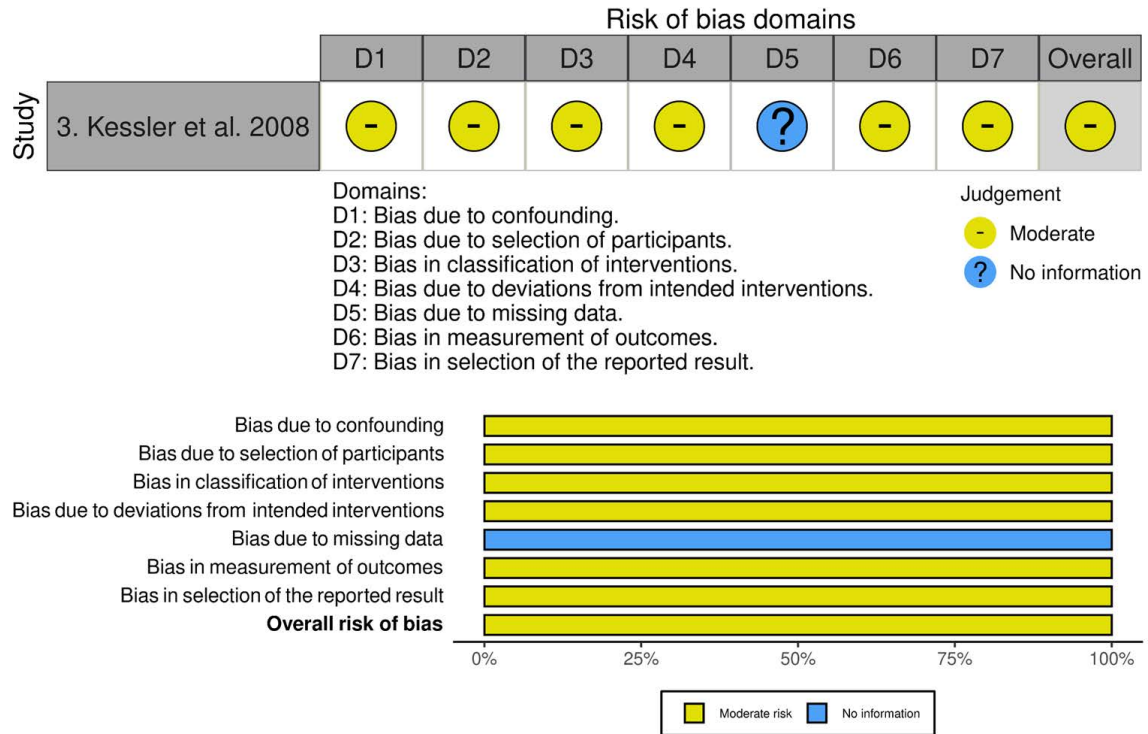

Supplemental Figure S3. ROBINS-I IKDC Examination Score

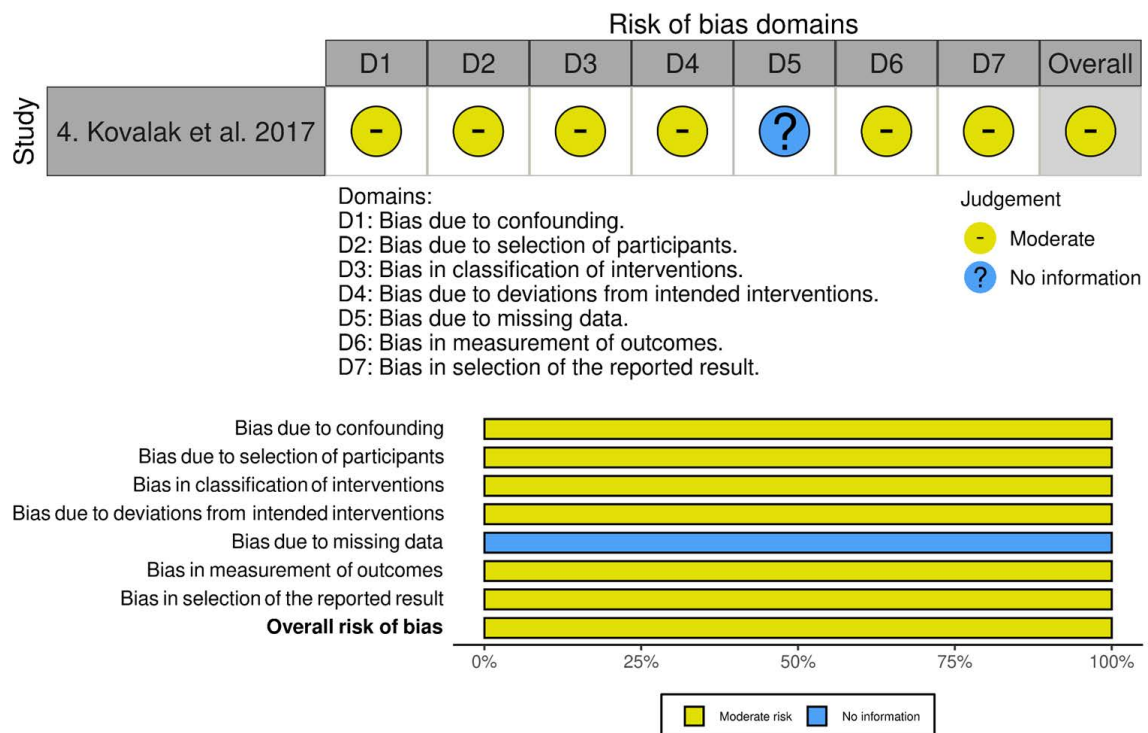

Supplemental Figure S4. ROBINS-I Joint position sense

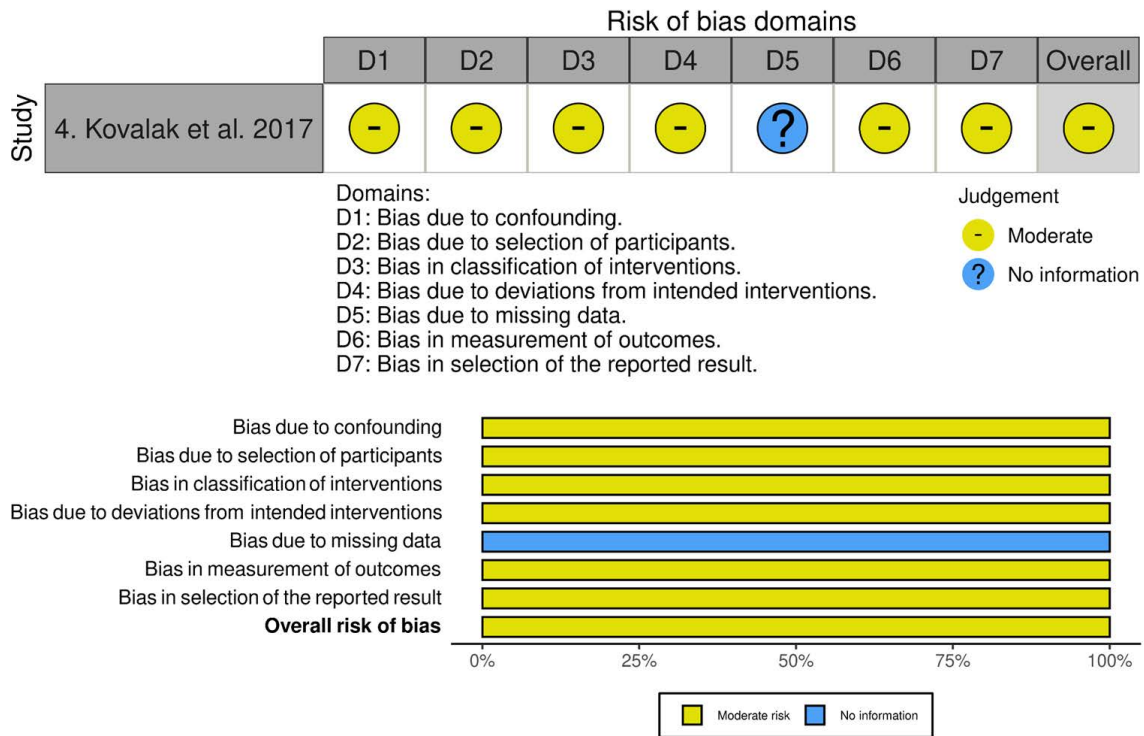

**Supplemental Figure S5. ROBINS-I Lysholm score**

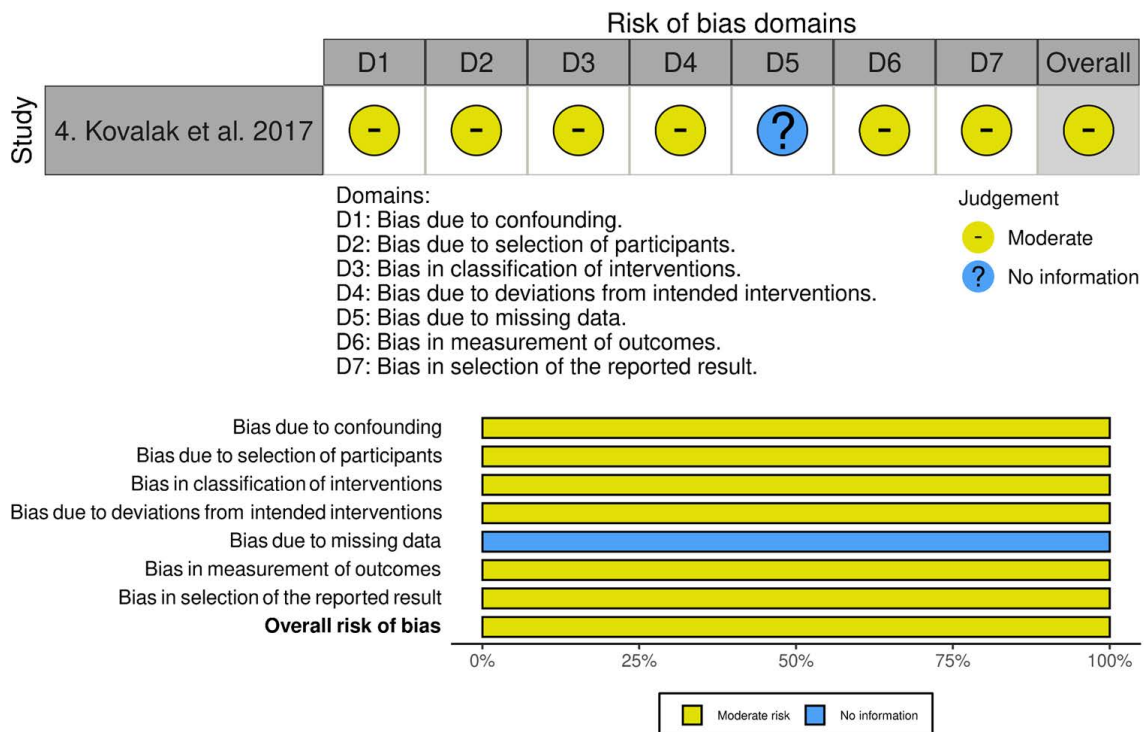

**Supplemental Figure S6. ROBINS-I Muscle strength**

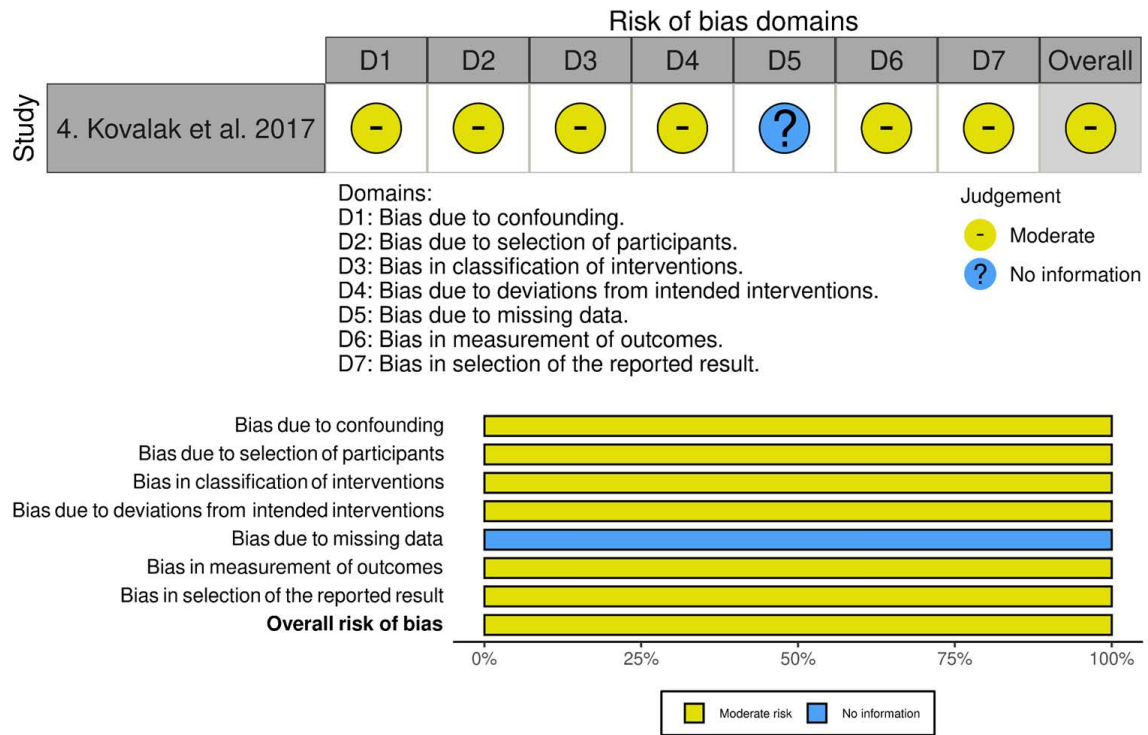

Supplemental Figure S7. ROBINS-I One-legged hop test

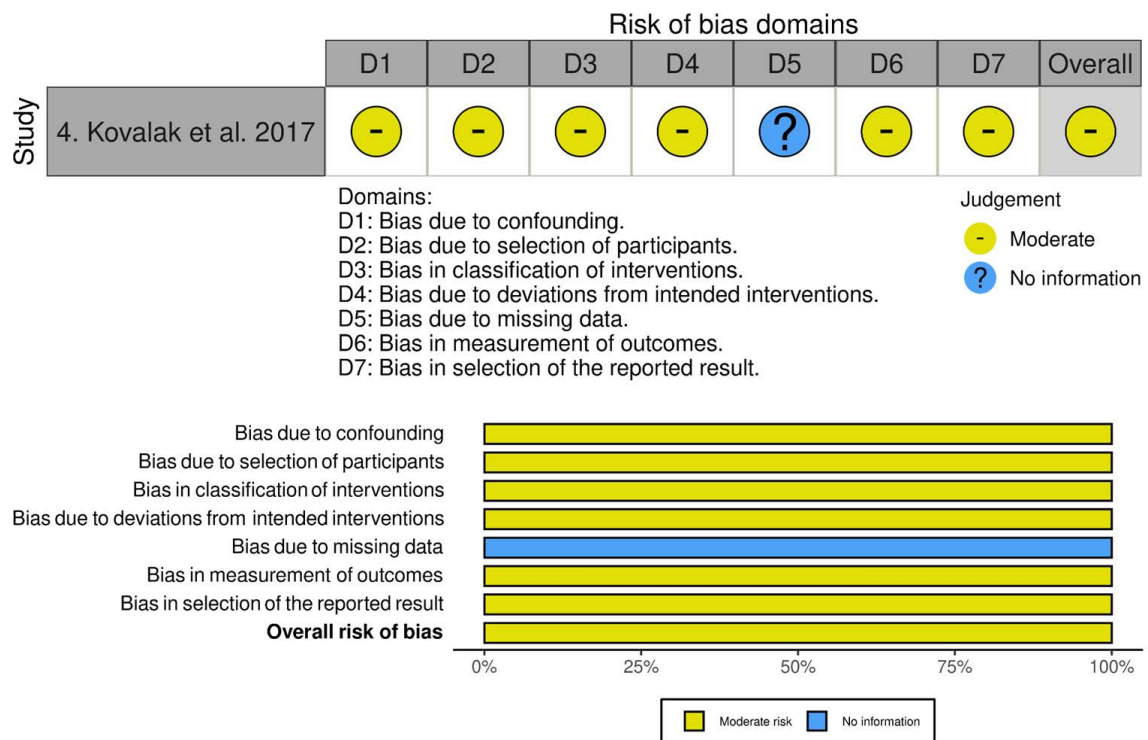

Supplemental Figure S8. ROBINS-I Proprioception

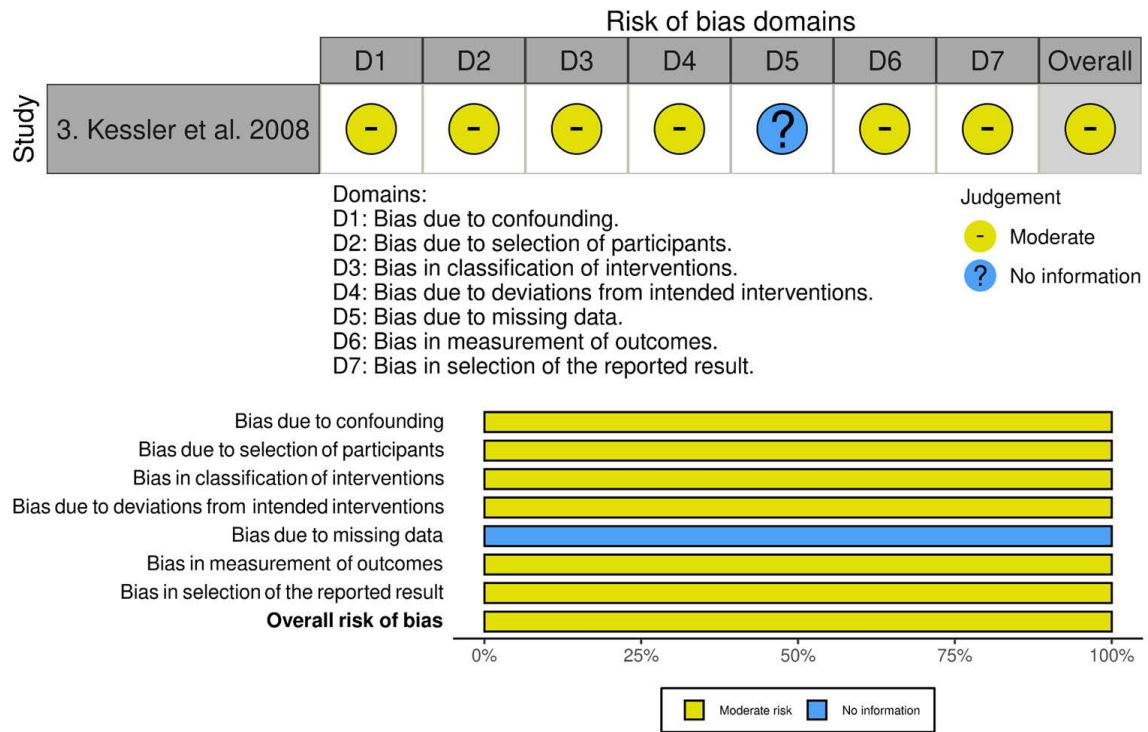

**Supplemental Figure S9. ROBINS-I Radiological signs of osteoarthritis**

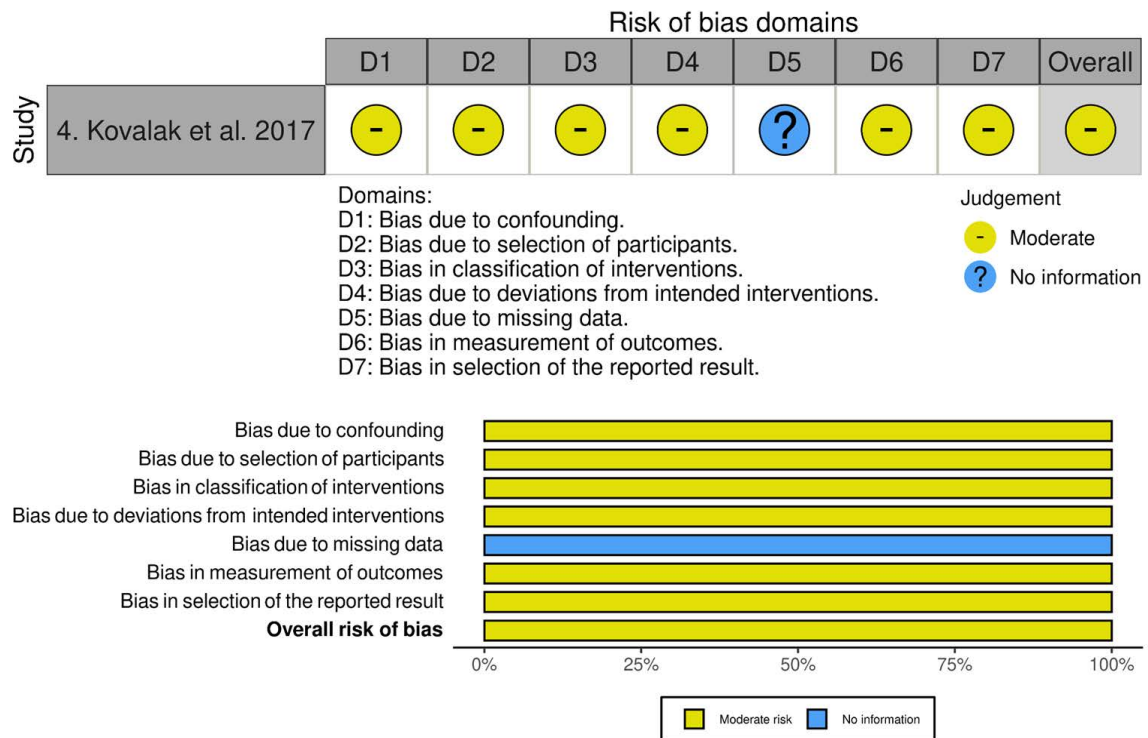

**Supplemental Figure S10. ROBINS-I SF-36 health profiles**

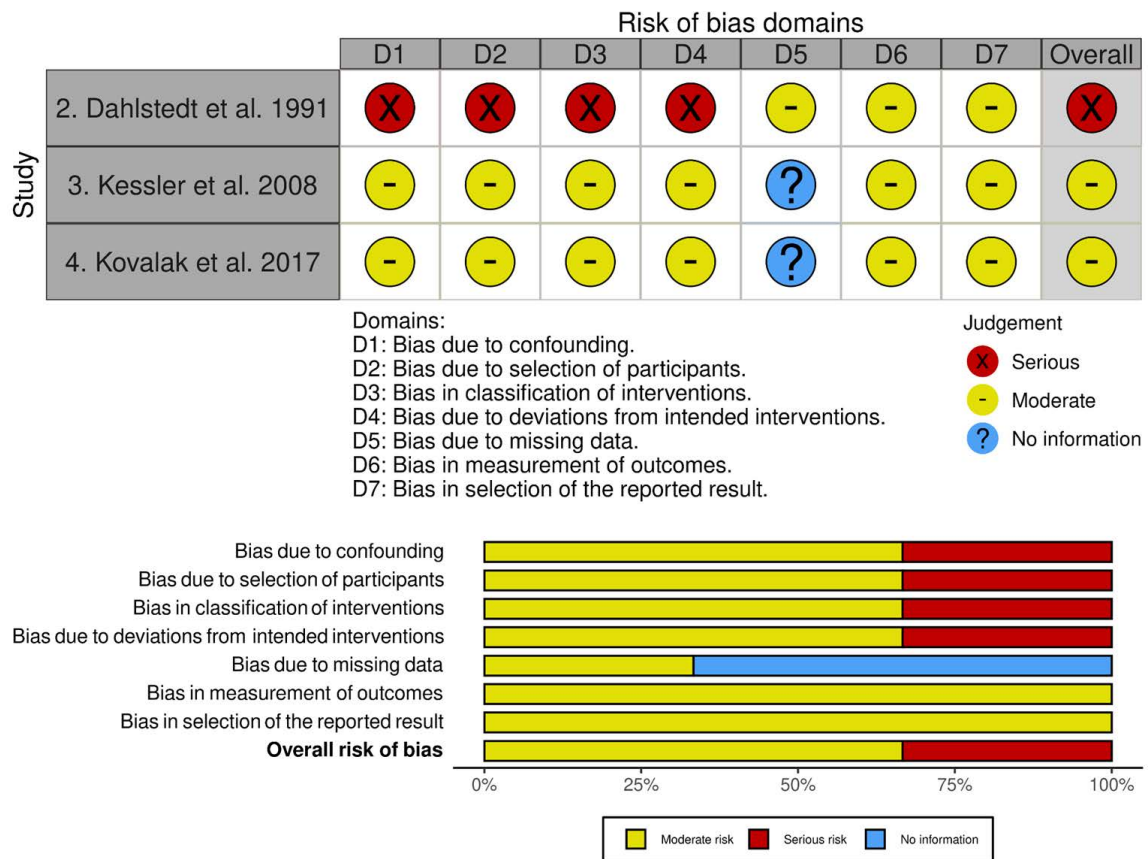

**Supplemental Figure S11.** ROBINS-I Tegner score

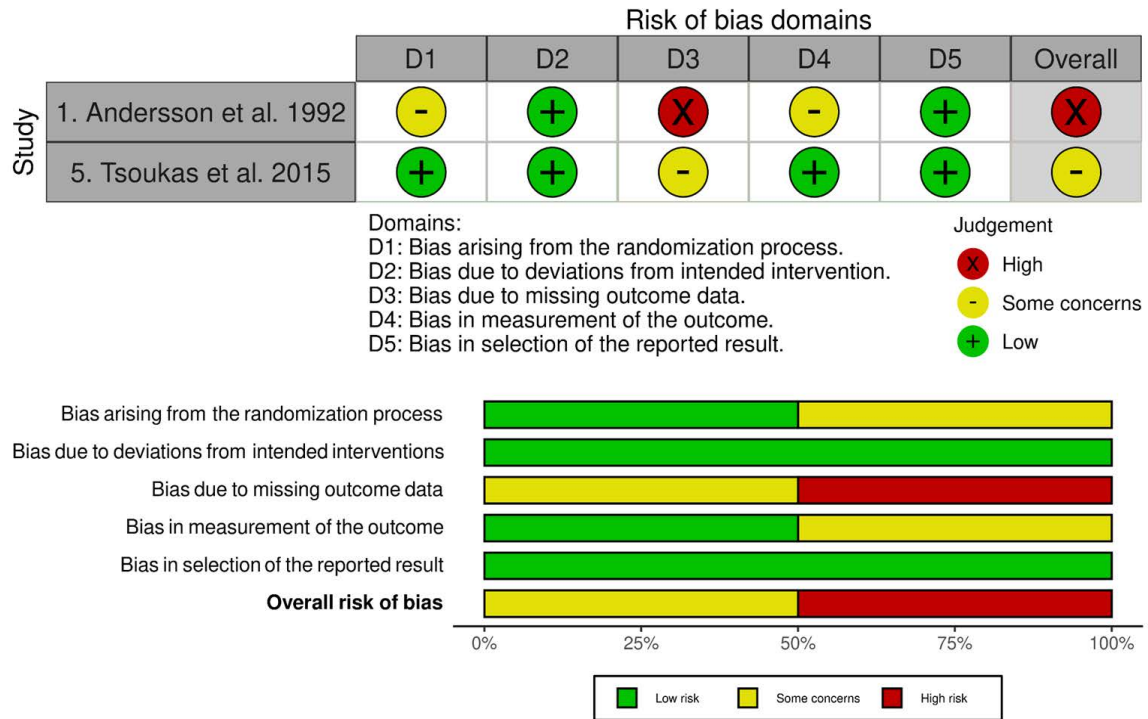

Supplemental Figure S12. ROB2 Summary

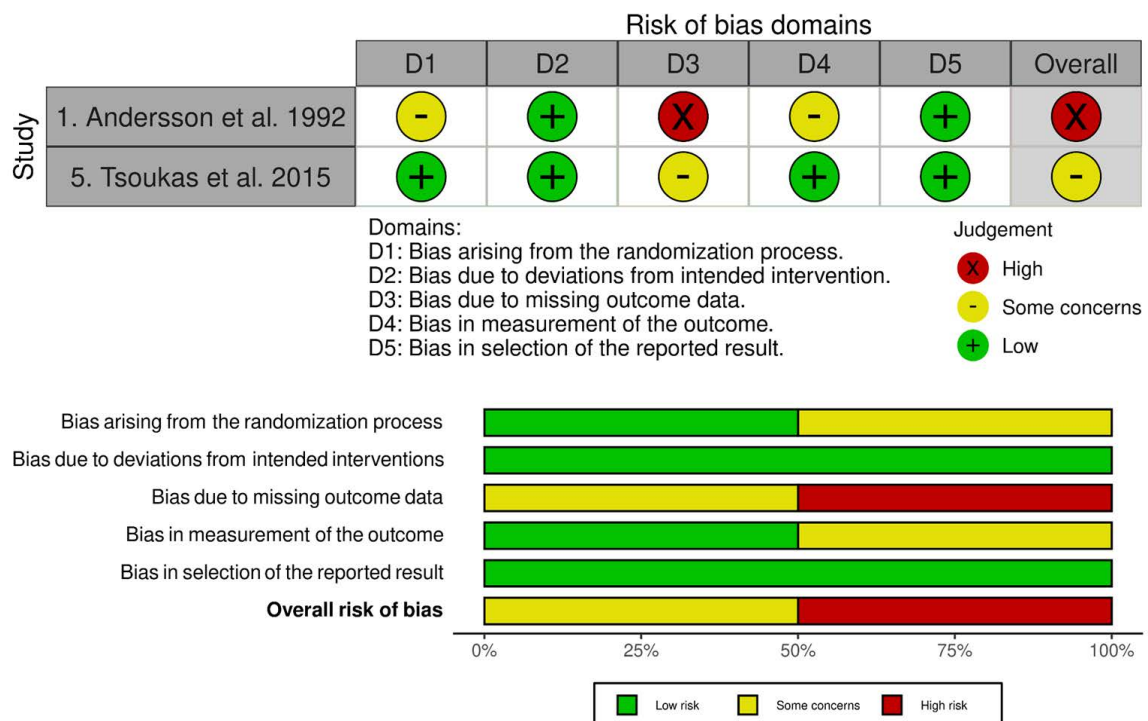

Supplemental Figure S13. ROB2 Knee laxity

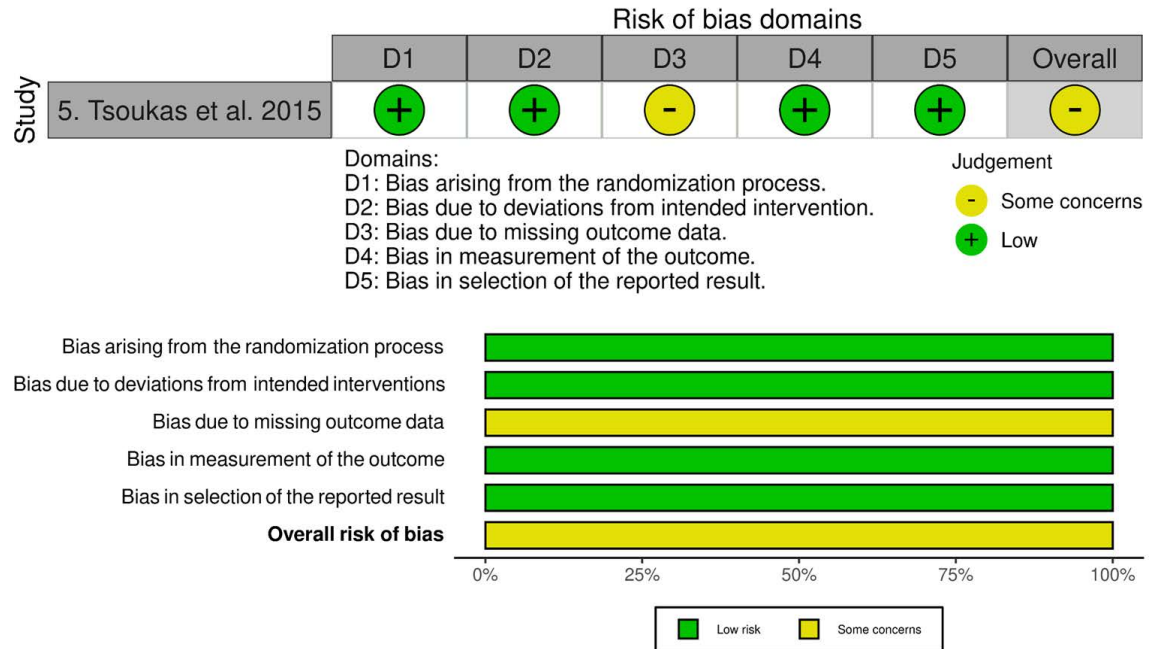

Supplemental Figure S14. ROB2 IKDC Evaluation Score

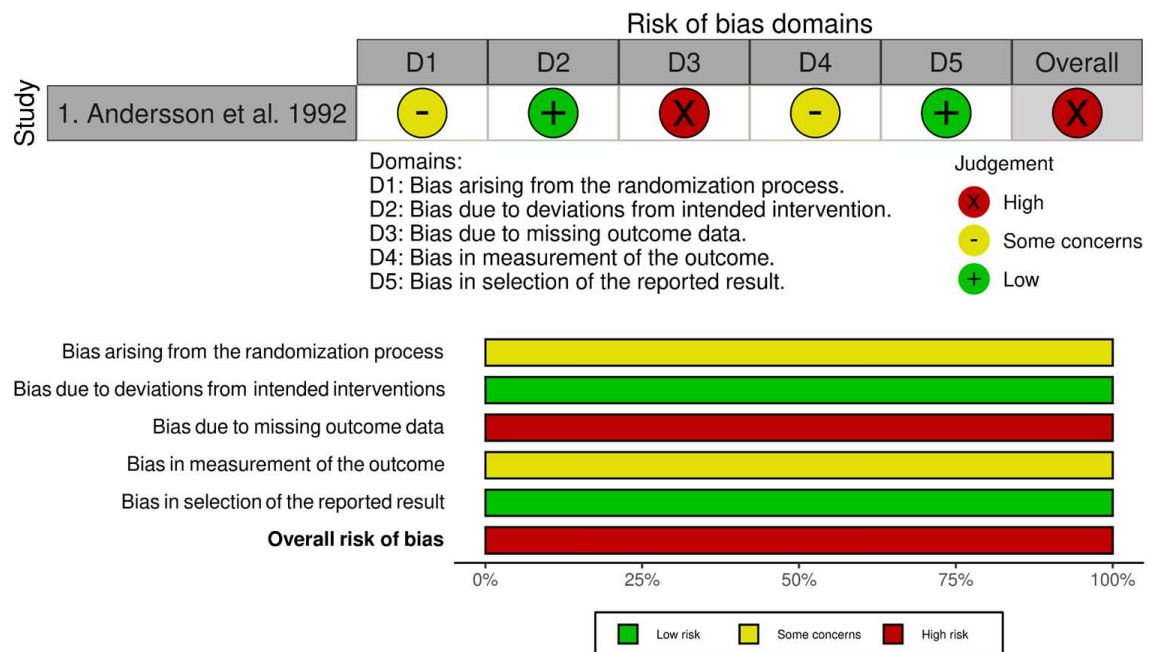

Supplemental Figure S15. ROB2 Lysholm score



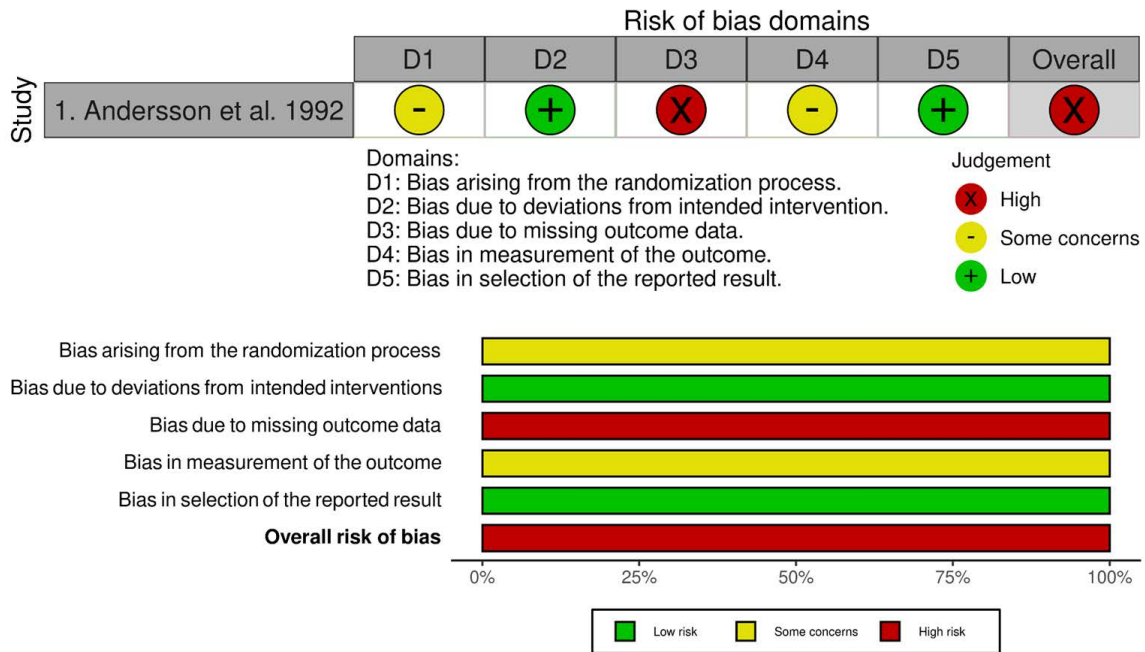

**Supplemental Figure S16. ROB2 Muscle strength**

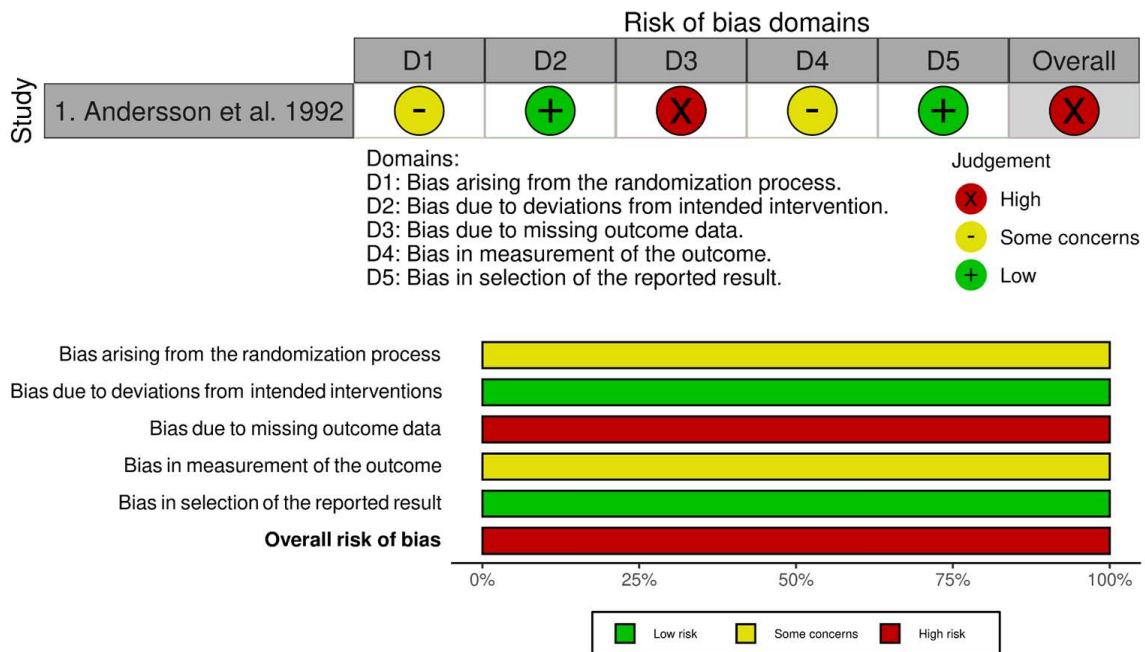

**Supplemental Figure S17. ROB2 One-legged hop test**

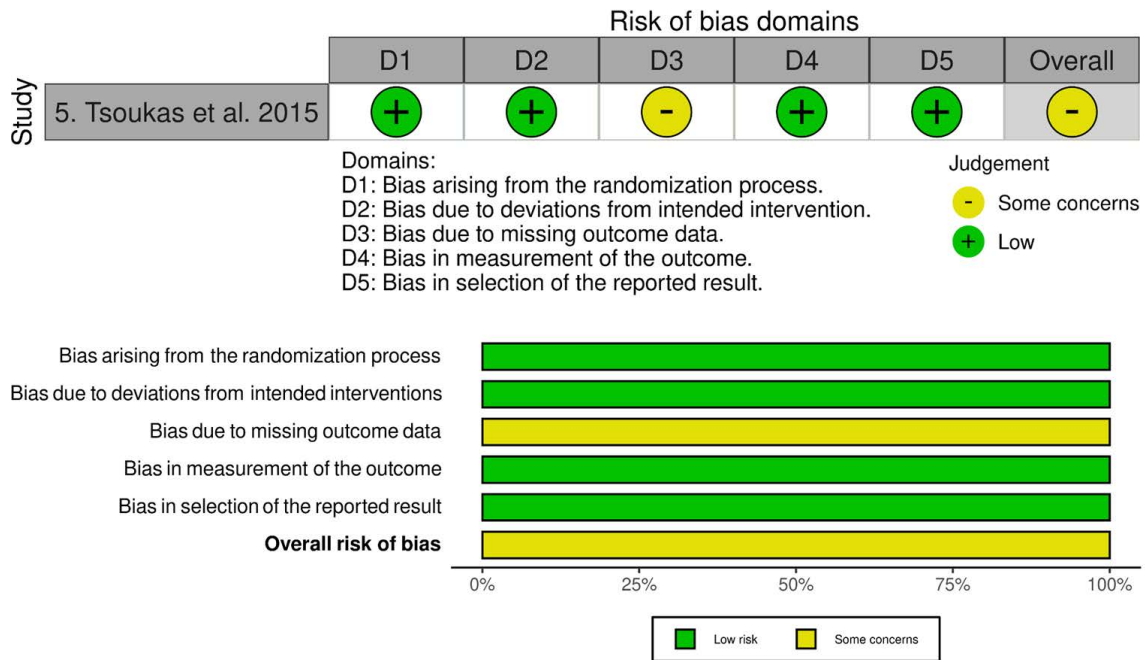

Supplemental Figure S18. ROB2 Radiological signs of osteoarthritis

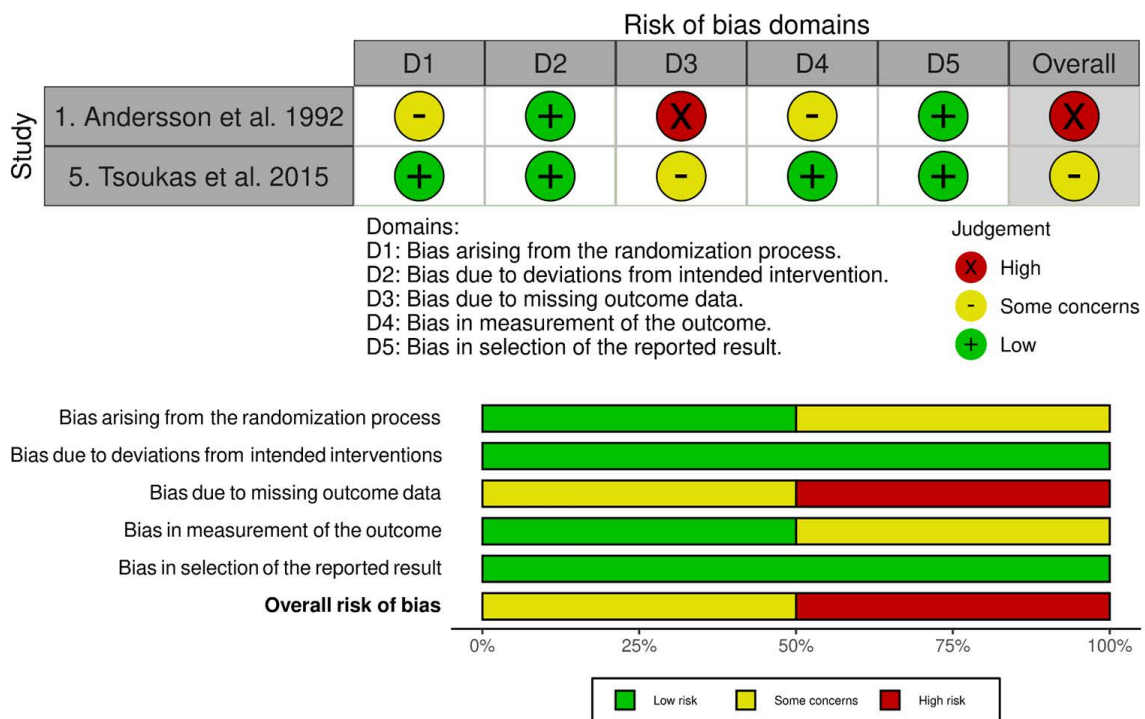

Supplemental Figure S19. ROB2 Tegner score
